# Supplementary material
Source: PubMed Central journal article supplement (PMC10282716)
Supplement: media-6.pdf [file media-6.pdf]

## Supplemental Information

### SARS-CoV-2 Nonstructural Proteins 3 and 4 tune the Unfolded Protein Response

Jonathan P. Davies<sup>†1</sup>, Athira Sivadas<sup>†1</sup>, Katherine R. Keller<sup>2</sup>, Richard J.H. Wojcikiewicz<sup>2</sup>, Lars Plate<sup>\*1,3,4</sup>

<sup>1</sup>Department of Biological Sciences, Vanderbilt University, Nashville, TN

<sup>2</sup>Department of Pharmacology, SUNY Upstate Medical University, Syracuse, NY

<sup>3</sup>Department of Chemistry, Vanderbilt University, Nashville, TN

<sup>4</sup>Department of Pathology, Microbiology and Immunology, Vanderbilt University Medical Center, Nashville, TN

<sup>†</sup>Contributed equally

\*Corresponding author:

Lars Plate  
Vanderbilt University  
Nashville, TN 37340  
Email: lars.plate@vanderbilt.edu  
Phone: (615)-343-3405

## Supplemental Tables

**Table S1** – UPR pathway protein sets used for proteomics analysis

**Table S2** – Mass spectrometry protein data of HEK293T cells

**Table S3** – Mass spectrometry peptide data of HEK293T cells

**Table S4** – Mass spectrometry protein data of A549 cells

**Table S5** – Mass spectrometry peptide data of A549 cells

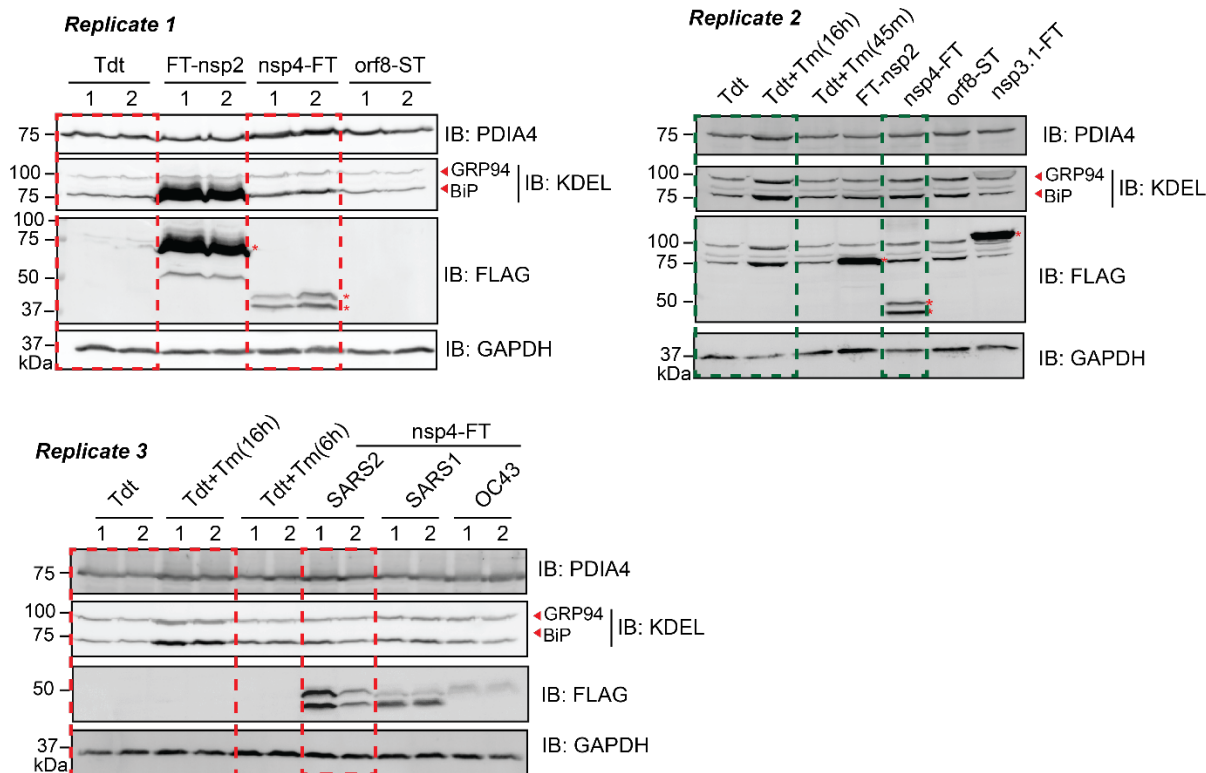

**Figure S1.** Western blot analysis of HEK293T cells transfected with specified viral proteins or Tdtomato as basal control. Tm treatment was used as a positive control. Green boxed lanes were shown for **Fig. 1c**. Green and red boxed lanes were quantified for **Fig. 1d**. Red asterisks indicate viral proteins. Tdt, tdTomato; Tm, Tunicamycin (1  $\mu$ g/mL); FT, FLAG-Tag; ST, StrepTag. Corresponding full blots are shown below.

Supplementary Fig.S1 - Replicate 1, Full blots

IB: PDIA4, low contrast

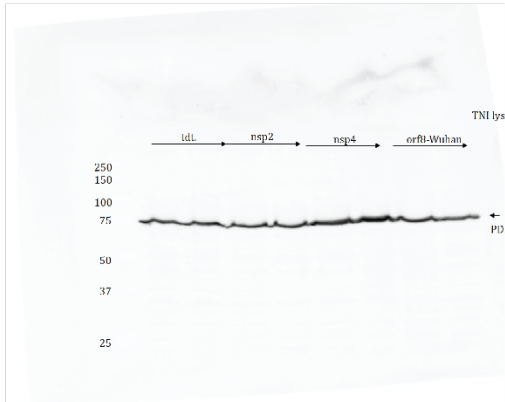

IB: PDIA4, high contrast

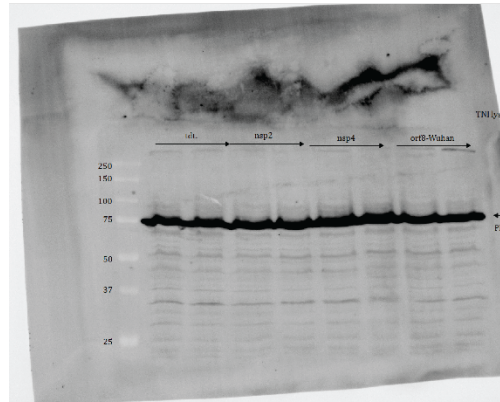

IB: FLAG

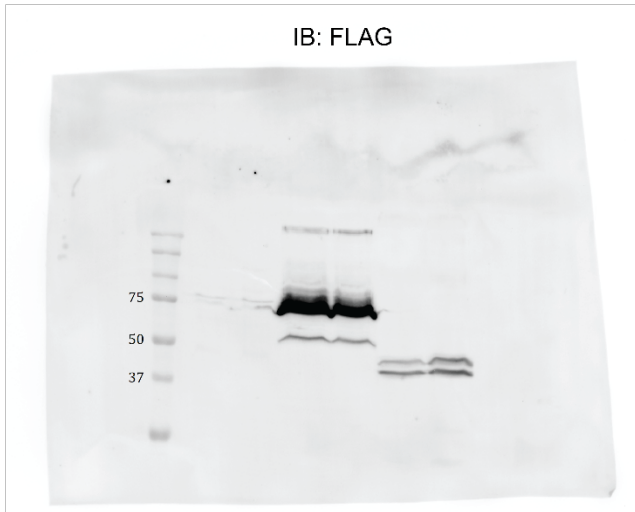

IB: KDEL

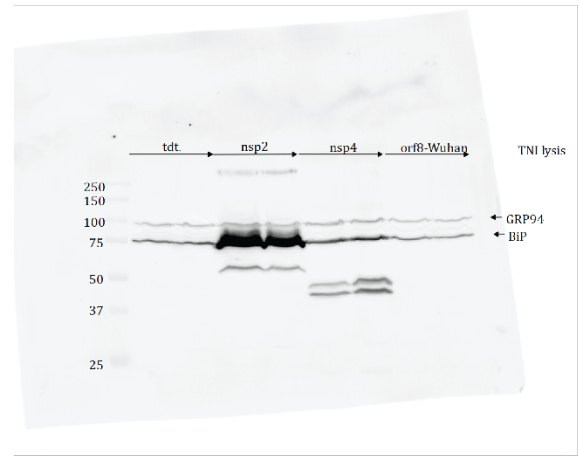

IB: GAPDH

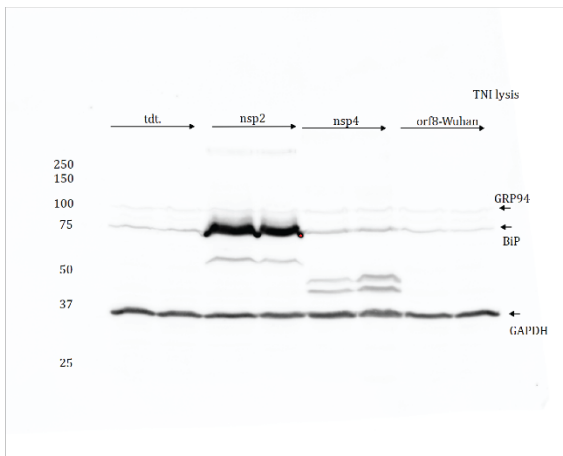

Supplementary Fig.S1 - Replicate 2, Full blots

IB: PDIA4

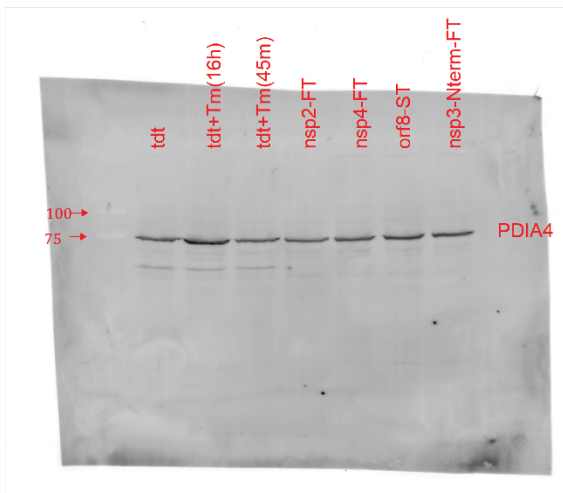

IB: FLAG

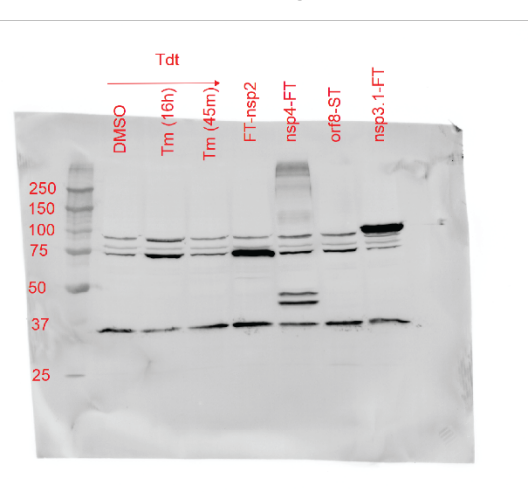

IB: KDEL

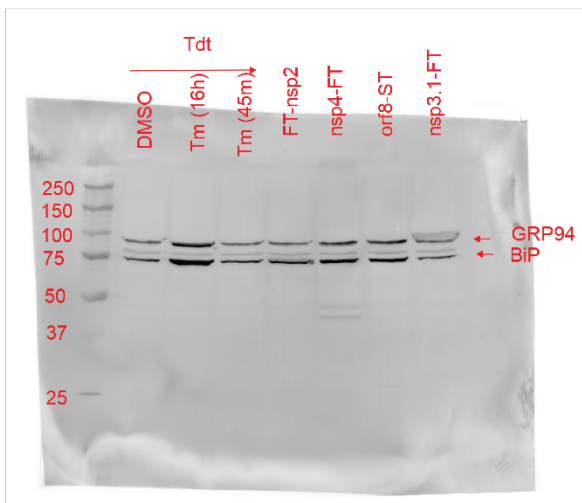

IB: GAPDH

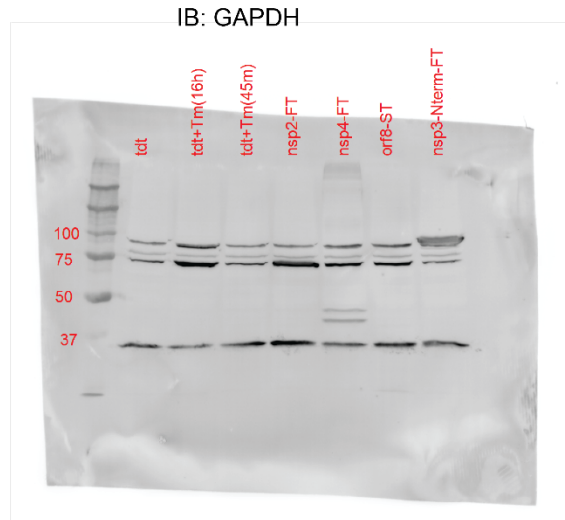



### Supplementary Fig.S1 - Replicate 3, Full blots

IB: PDIA4

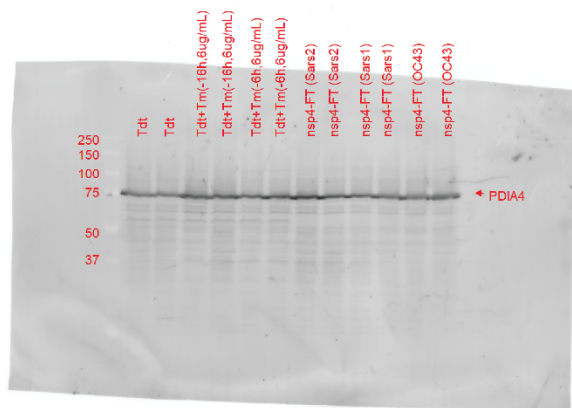

IB: FLAG

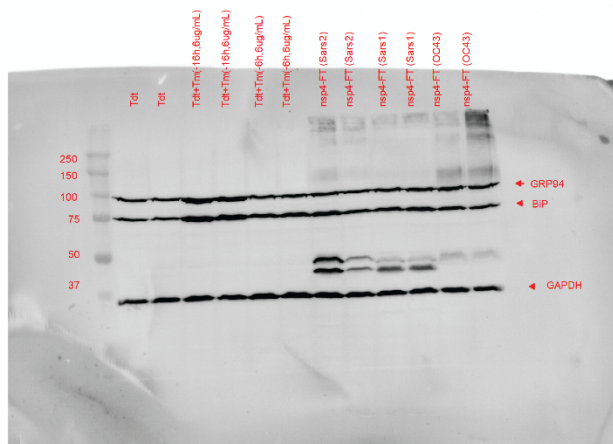

IB: KDEL

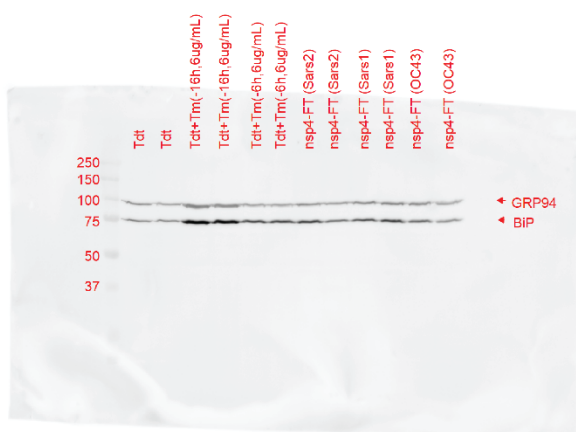

IB: GAPDH

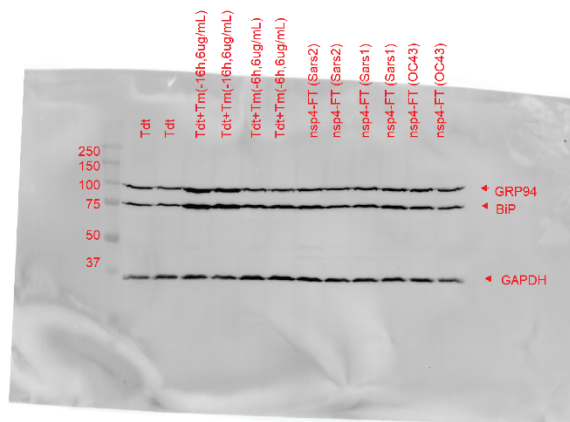

### Replicate 1

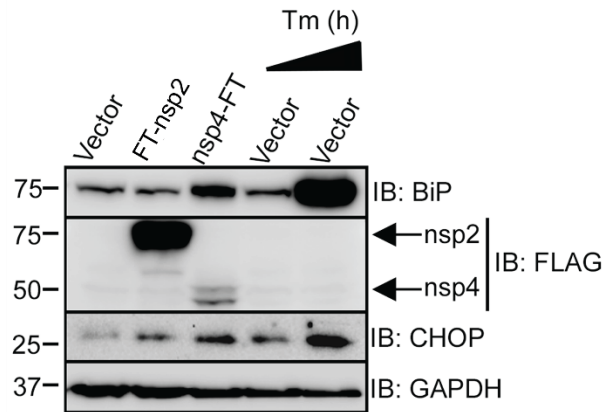

### Replicate 2

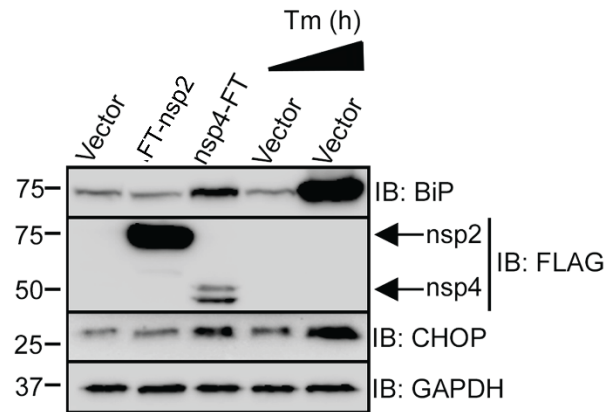

### Replicate 3

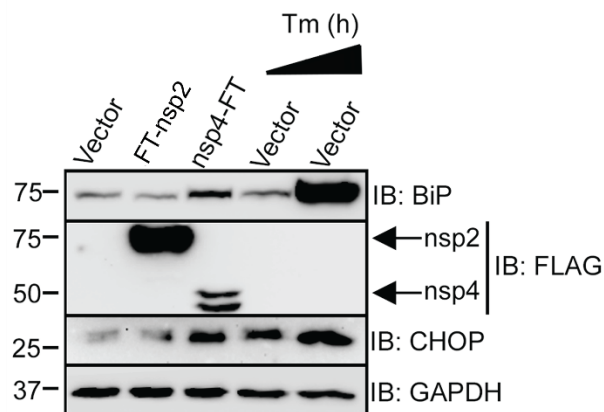

**Figure S2.** Blots quantified for **Fig. 1f**. Replicate 2 blot was shown in **Fig. 1e**. WT-HEK293T cells were transfected with empty vector or SARS-CoV-2 FT-nsp2 or nsp4-FT, with control vector samples treated for 4 or 20 h Tunicamycin (5  $\mu$ g/mL). Western blotting for M2-FLAG, BiP, and CHOP shows marked upregulation of BiP and CHOP in nsp4-FT expressing cells. Corresponding full blots are shown below.

Supplementary Fig. S2, Replicate 1 Full blots

# Replicate 1

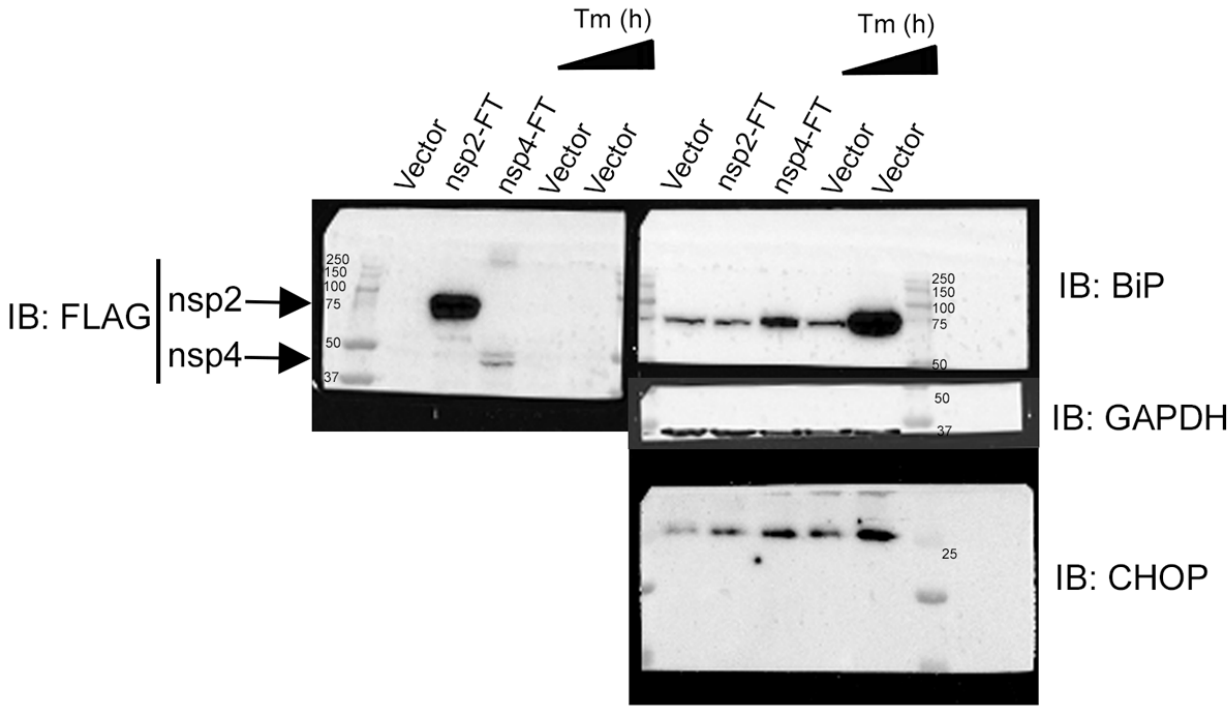

Supplementary Fig. S2, Replicate 2 Full blots

# Replicate 2

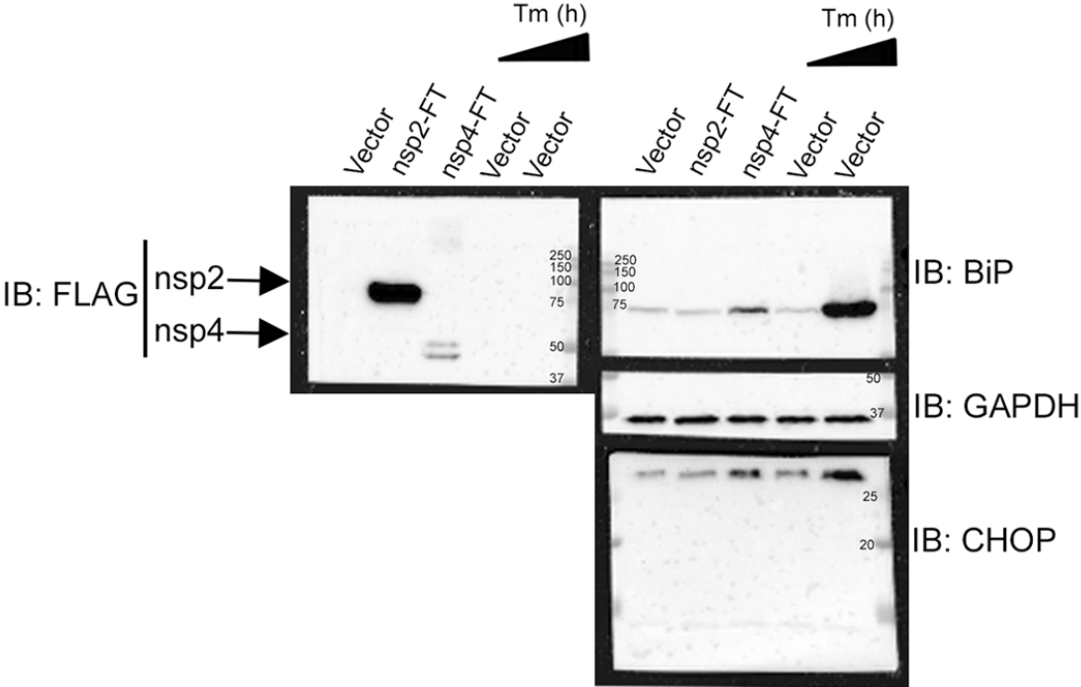

Supplementary Fig. S2, Replicate 3 Full blots

# Replicate 3

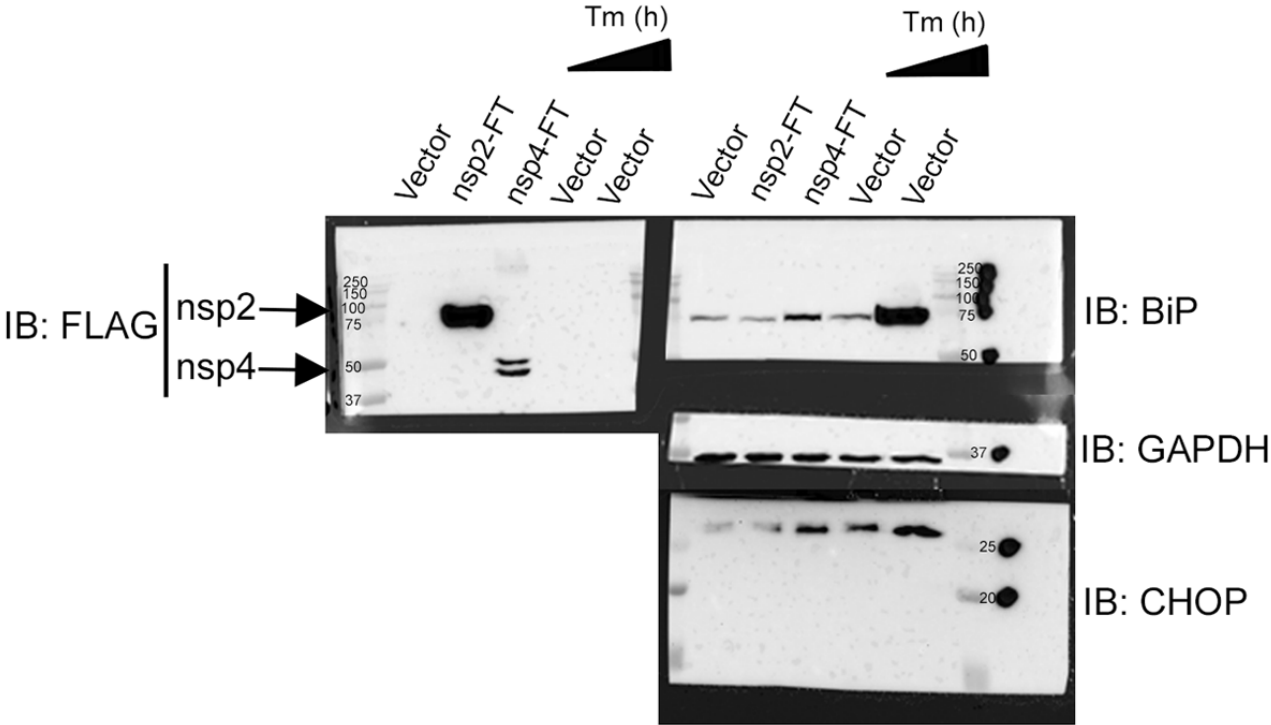

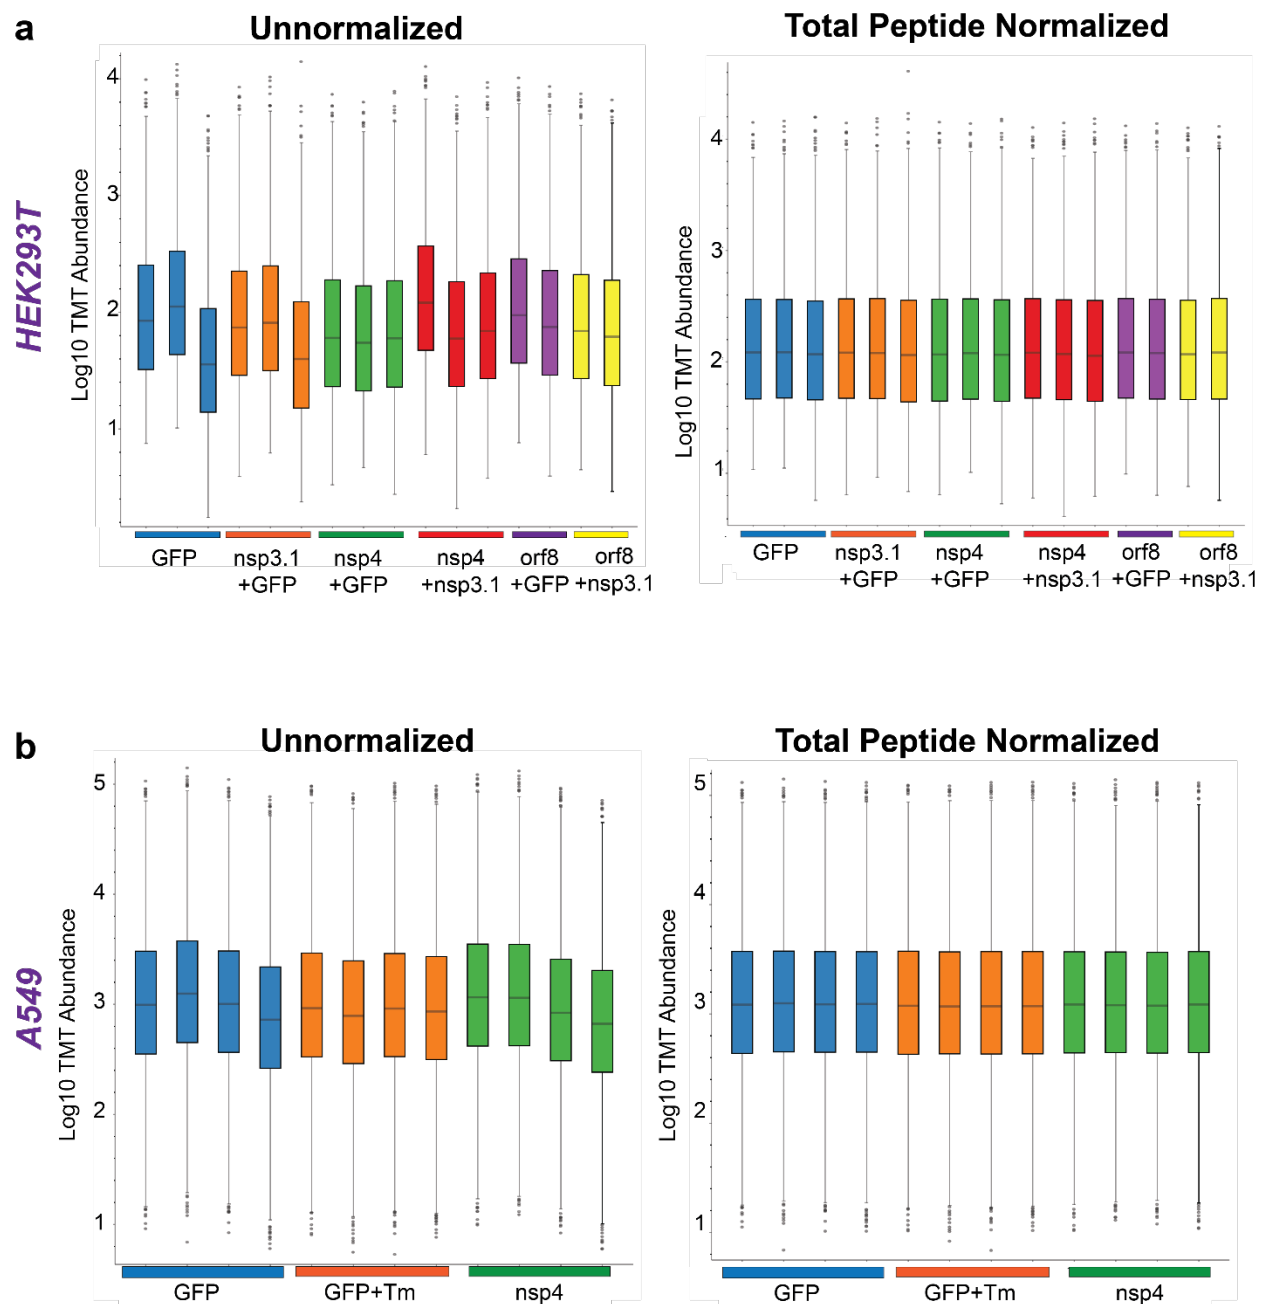

**Figure S3.** HEK293T (a) or A549 (b) cells were transfected with GFP (basal control) or corresponding viral proteins, lysates harvested and lysed at 40 h post-transfection, labeled with TMTpro isobaric labels, and analyzed by tandem mass spectrometry (LC/MS-MS). Identified proteins were normalized by total peptide amount.

- a) Unnormalized and unnormalized log<sub>10</sub> TMT abundances for MS experiment analyzing HEK293T UPR, corresponding to **Fig. 2,3**.
- b) Unnormalized and unnormalized log<sub>10</sub> TMT abundances for MS experiment analyzing A549 UPR, corresponding to **Fig. 2**.

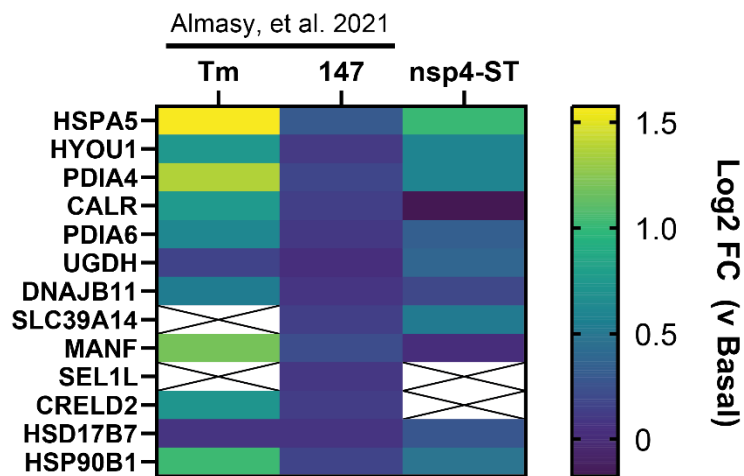

**Figure S4.** ATF6 marker log<sub>2</sub> fold change enrichment over basal conditions in HEK293T cells with treatment of Tm (1  $\mu$ g/mL, 16 h), **147** (10  $\mu$ M, 16 h), or nsp4-ST expression. Samples were quantified by TMTpro-based LC/MS-MS. Basal conditions are Tdtomato transfection with DMSO for drug treatment or GFP transfection for nsp4-ST treatment. Previously published data from Almasy, Davies, Plate *MCP* 2021 is annotated<sup>1</sup>.

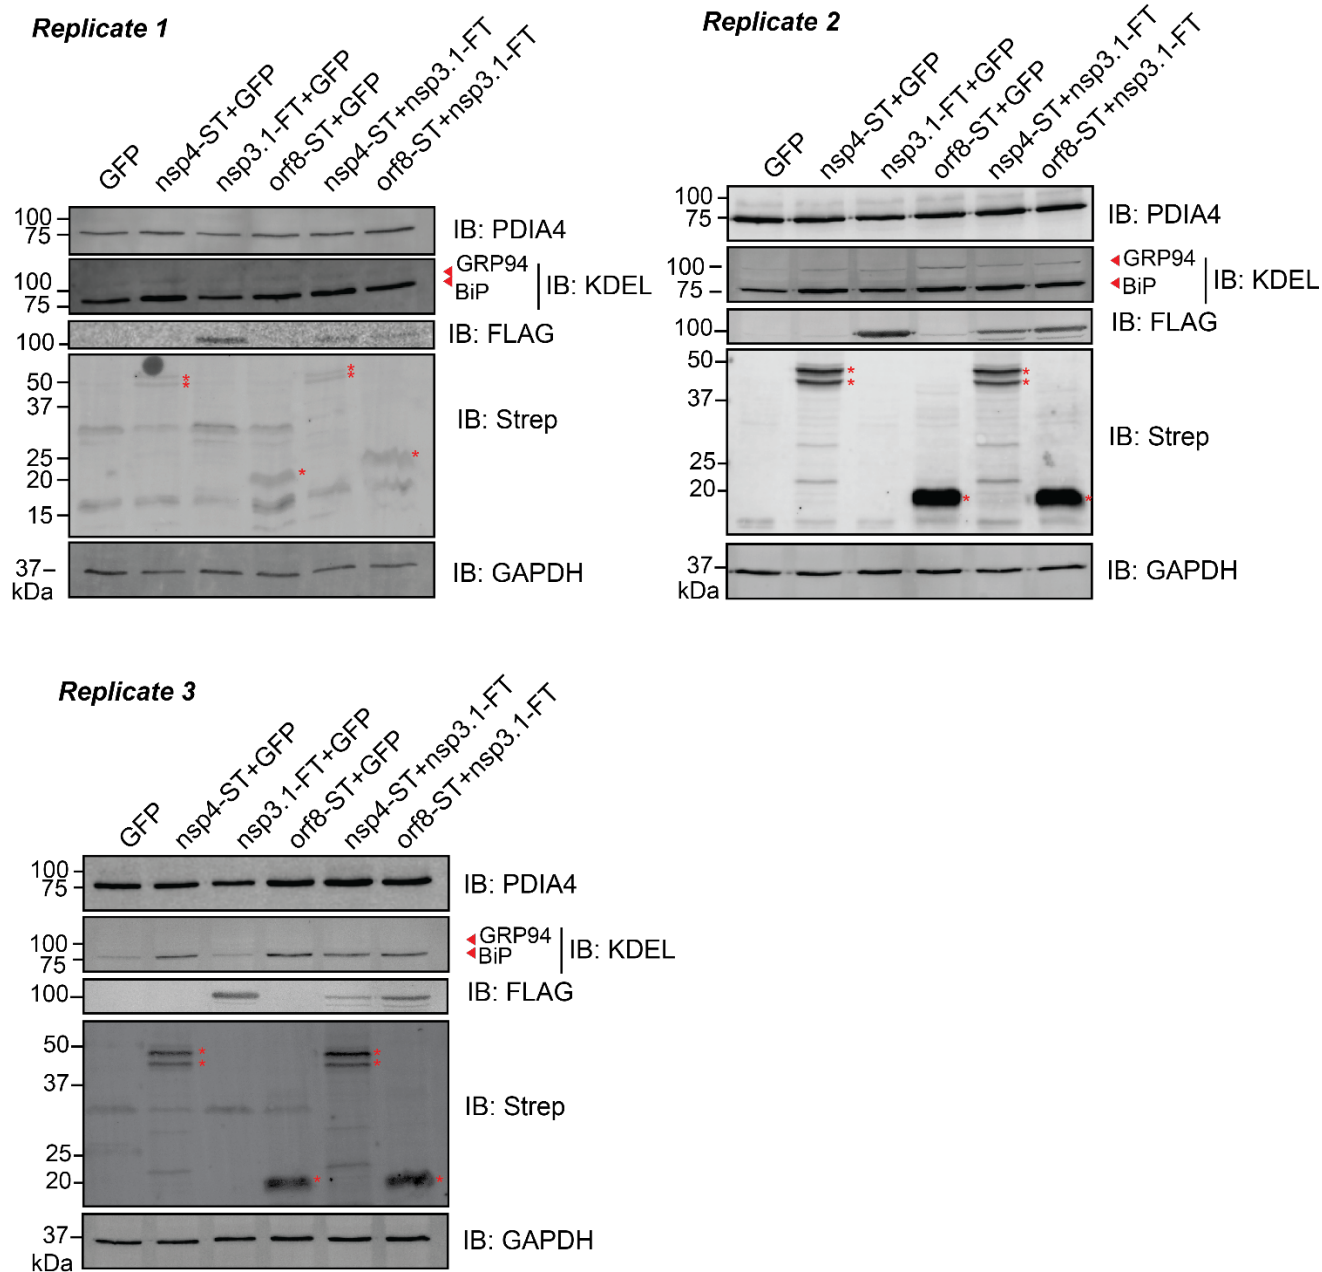

**Figure S5.** Blots quantified for **Fig. 3c**, replicate 2 was shown in **Fig. 3b**. Red asterisks indicate viral proteins. Corresponding full blots are shown below.



Supplemental Fig.S5 - Replicate 1, Full blots

IB: PDIA4

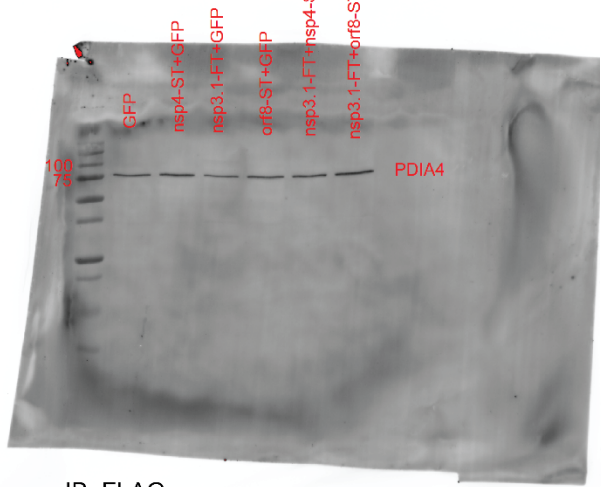

IB: FLAG

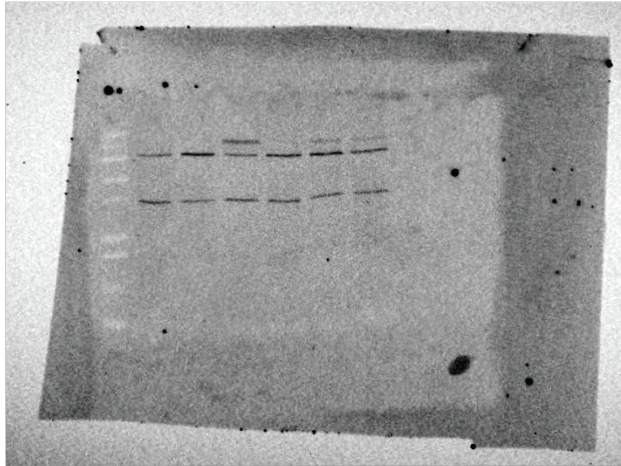

IB: KDEL

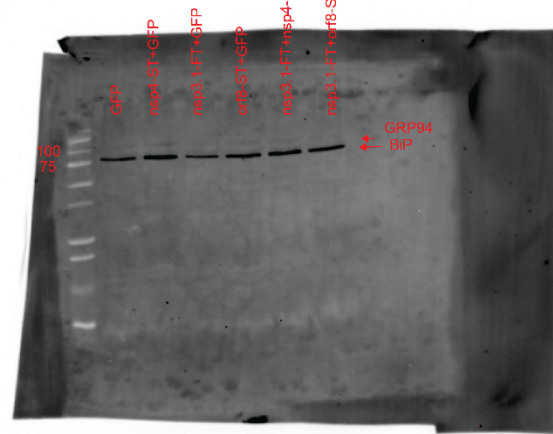

IB: Strep

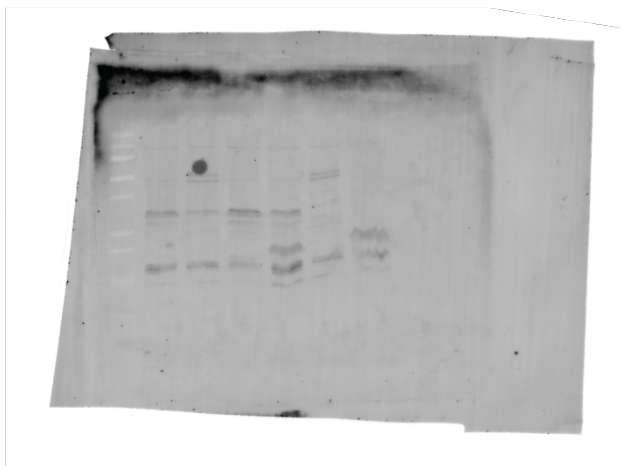

IB: GAPDH

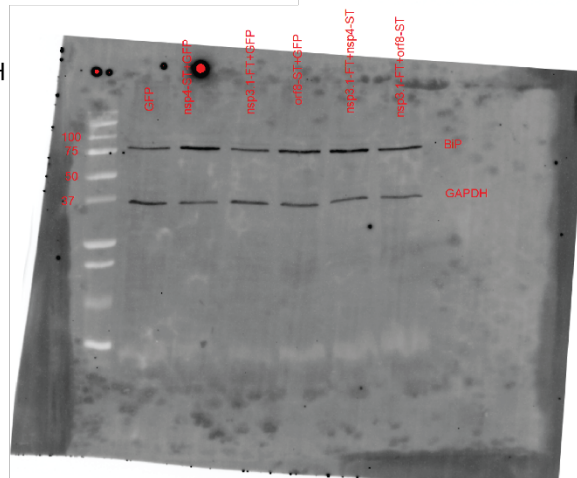

Supplemental Fig.S5 - Replicate 2, Full blots

IB: PDIA4

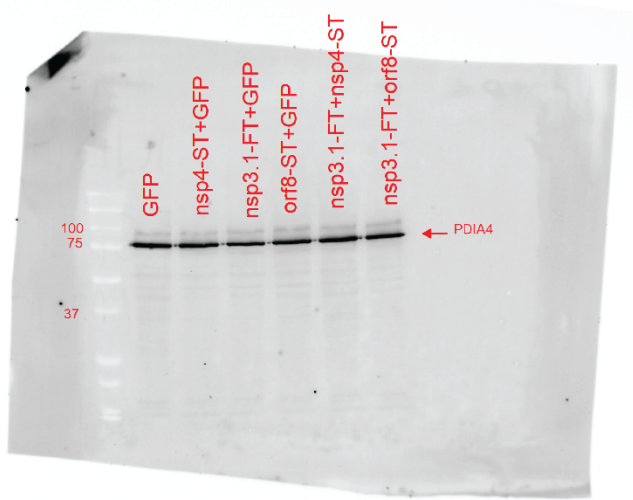

IB: KDEL

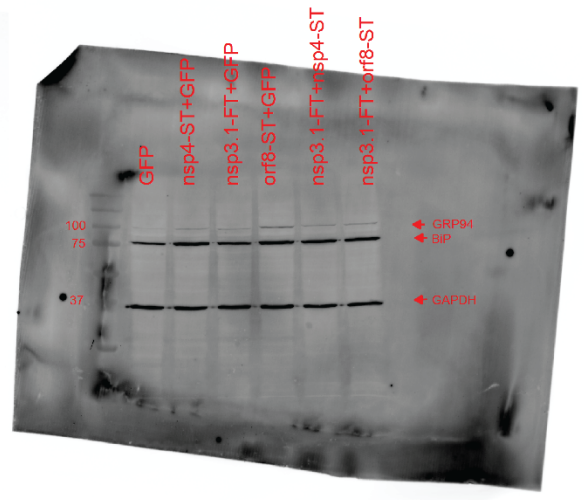

IB: FLAG

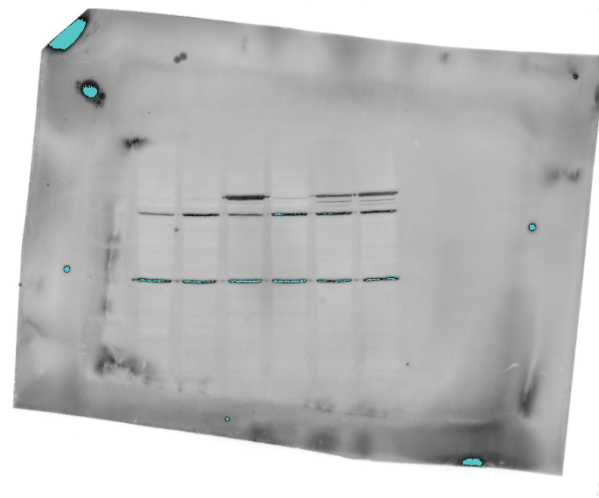

IB: Strep

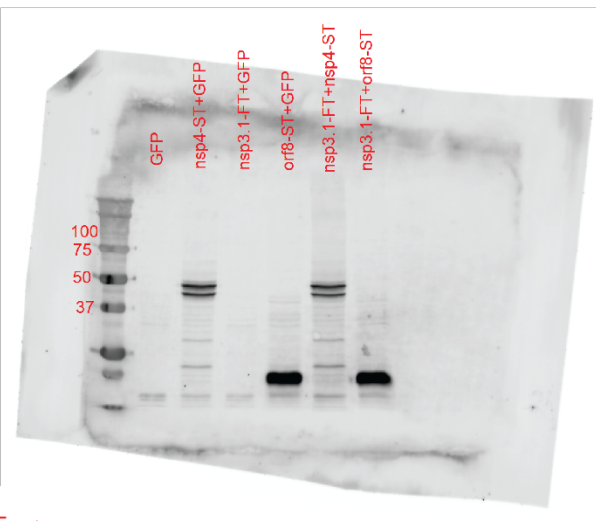

IB: GAPDH

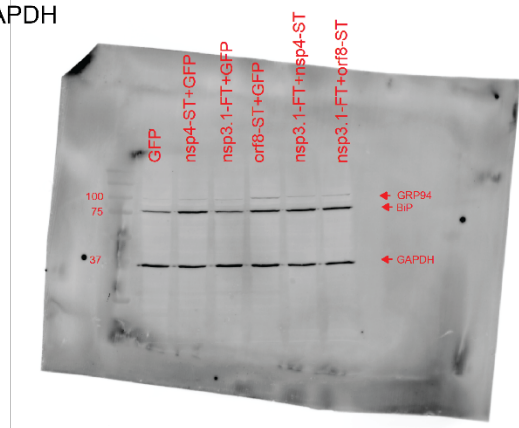



Supplemental Fig.S5 - Replicate 3, Full blots

IB: PDIA4

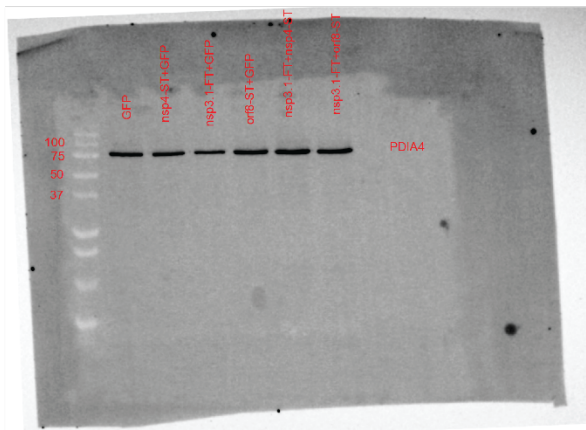

IB: KDEL

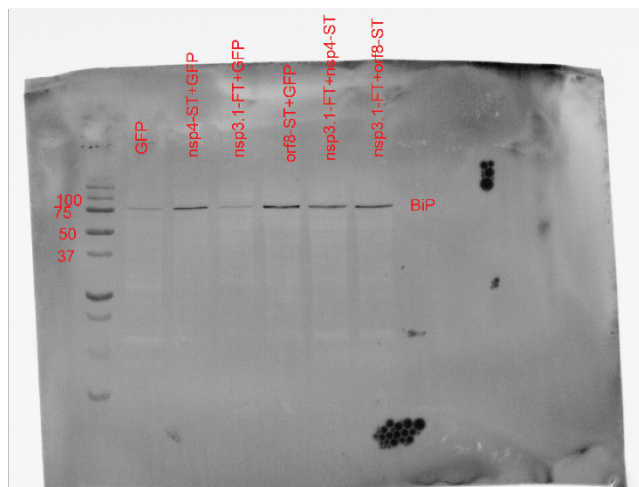

IB: FLAG

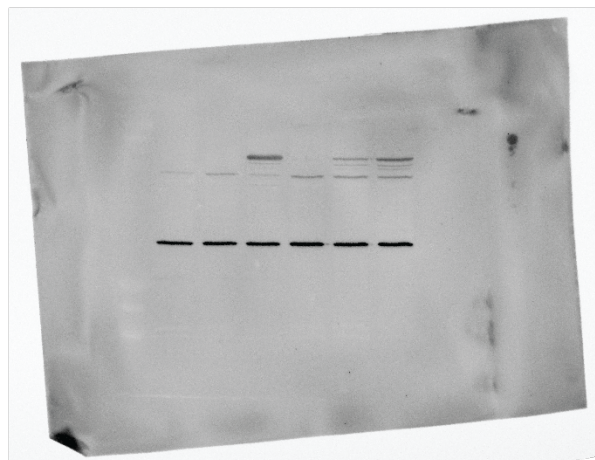

IB: Strep

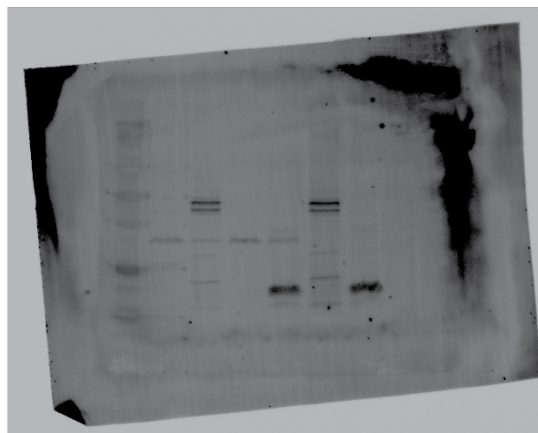

IB: GAPDH

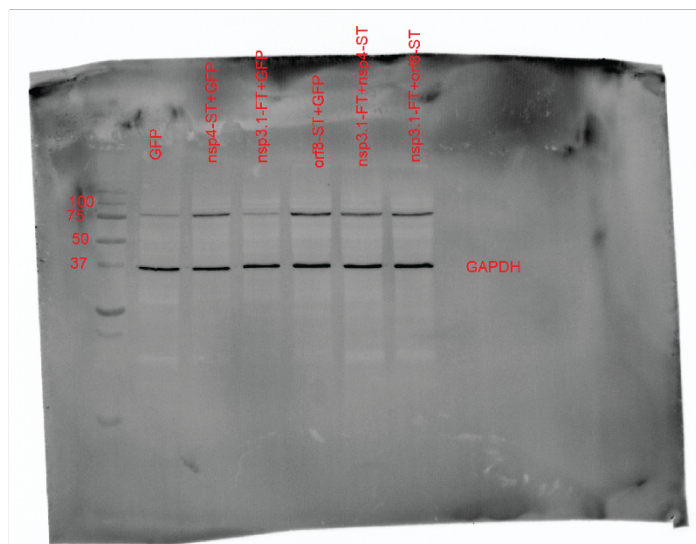

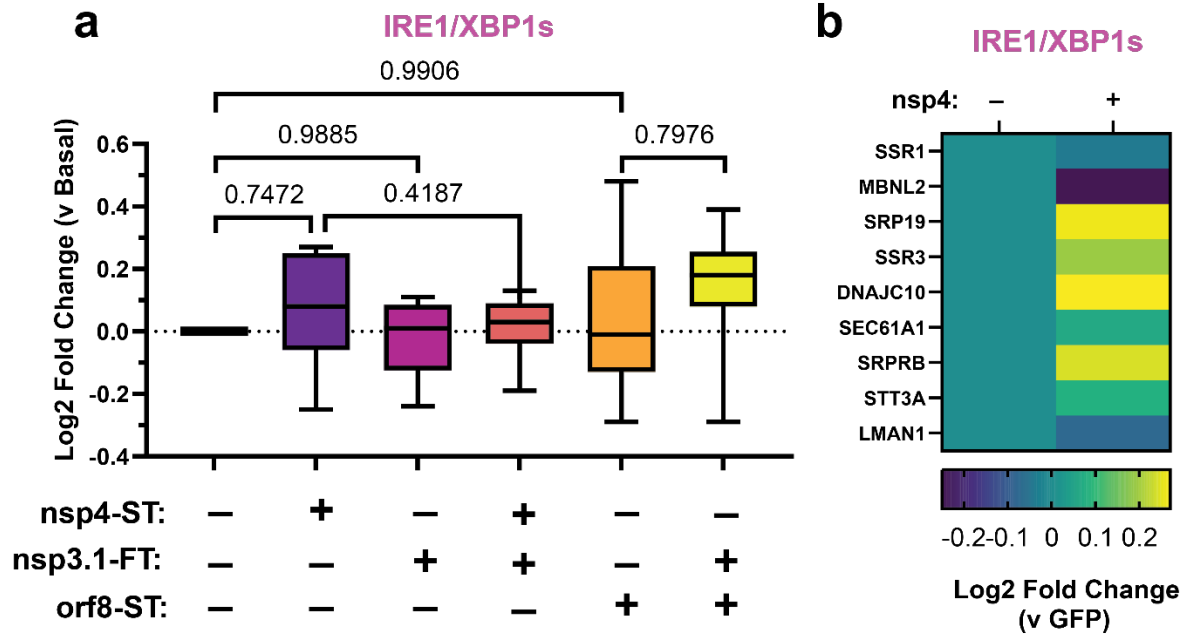

**Figure S6.**

- a) Global proteomics analysis of IRE1/XBP1s protein marker levels in the presence of SARS-CoV-2 nsp4-ST, nsp3.1-FT, orf8-ST, or specified combinations. Box-and-whisker plot shows median, 25<sup>th</sup> and 75<sup>th</sup> quartiles, and minimum and maximum values. one-way ANOVA with Geisser–Greenhouse correction and post-hoc Tukey’s multiple comparison test was used to determine significance,  $p < 0.05$  considered significant; 1 MS run,  $n = 2$ -3 biological replicates. See **Supplemental Tables S2, S3** for mass spectrometry data set.
- b) Individual IRE1/XBP1s pathway protein markers in the absence or presence of nsp4-ST, from (a).

**a**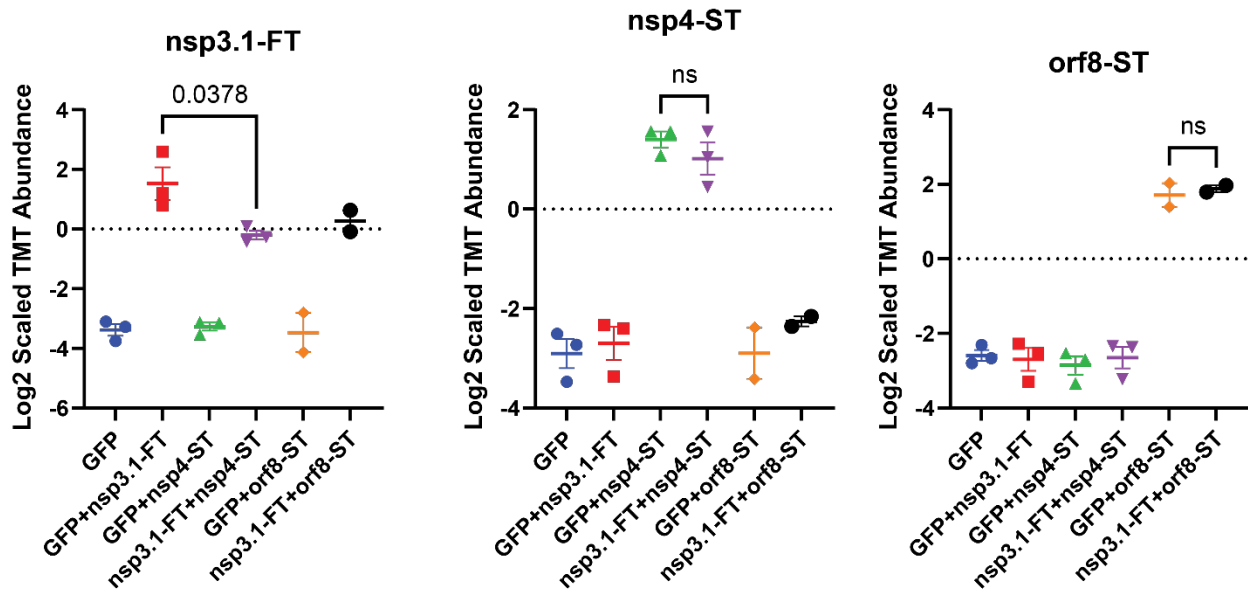**b**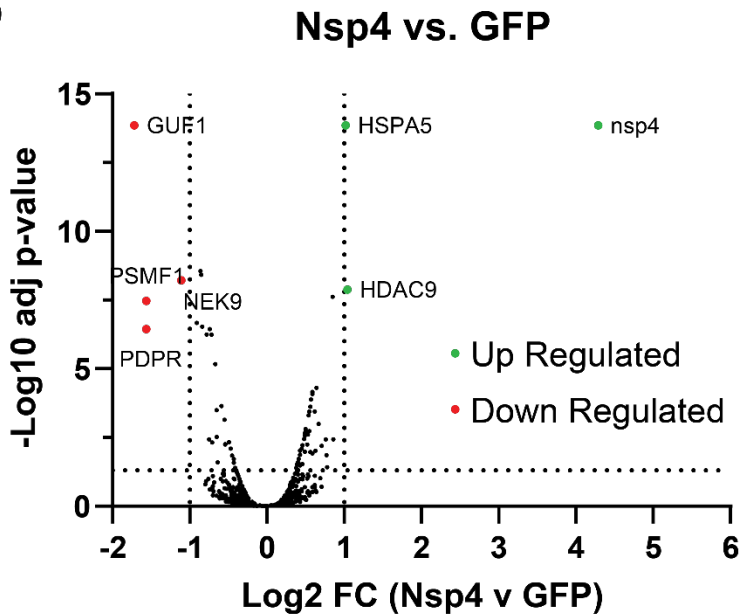**Figure S7.**

- a) SARS-CoV-2 nsp3.1-FT, nsp4-ST, and orf8-ST protein abundances (log<sub>2</sub> scaled TMT abundances) in experiment corresponding to **Fig. 3**. n = 2-3 biological replicates, 1 MS run, T-test for significance between indicated samples, *p*-value annotated.
- b) Volcano plot of global proteome in HEK293T cells in the presence or absence of SARS-CoV-2 nsp4-ST (corresponding to **Fig. 2,3**). Cut-offs indicate Log<sub>2</sub> FC < -1 or > 1, *p*-value < 0.05. T-test was used for significance testing, with testing for multiple corrections.

## References

- (1) Almasy, K. M.; Davies, J. P.; Plate, L. Comparative Host Interactomes of the SARS-CoV-2 Nonstructural Protein 3 and Human Coronavirus Homologs. *Mol. Cell. Proteomics* **2021**, *20*, 100120. <https://doi.org/10.1016/j.mcpro.2021.100120>.
